# Supplementary material for: Carbohydrate Modified Diet & Insulin Sensitizers Reduce Body Weight & Modulate Metabolic Syndrome Measures in EMPOWIR (Enhance the Metabolic Profile of Women with Insulin Resistance): A Randomized Trial of Normoglycemic Women with Midlife Weight Gain
Source: PubMed Central journal article supplement (PMC4178125; doi:10.1371/journal.pone.0108264), 2014-09-26
Supplement: pone.0108264.s003.pdf [file pone.0108264.s003.pdf]

Figure S6: Shapiro-Wilk's Tests of Normality for Primary and Secondary Outcome Variables and Relevant Covariates

| Tests of Normality                        |                     |                                 |    |      |              |    |       |
|-------------------------------------------|---------------------|---------------------------------|----|------|--------------|----|-------|
|                                           |                     | Kolmogorov-Smirnov <sup>a</sup> |    |      | Shapiro-Wilk |    |       |
|                                           |                     | Statistic                       | df | Sig. | Statistic    | df | Sig.  |
| study drug 1 st 6 months                  |                     |                                 |    |      |              |    |       |
| screening/baseline weight in kg CORRECTED | placebo             | .181                            | 8  | .200 | .947         | 8  | .677  |
|                                           | metformin           | .192                            | 4  |      | .975         | 4  | .875  |
|                                           | metformin & avandia | .312                            | 3  |      | .896         | 3  | .372  |
| 6 month weight in kg CORRECTED            | placebo             | .201                            | 8  | .200 | .958         | 8  | .788  |
|                                           | metformin           | .374                            | 4  |      | .808         | 4  | .117  |
|                                           | metformin & avandia | .187                            | 3  |      | .998         | 3  | .914  |
| waist at baseline in cm                   | placebo             | .251                            | 8  | .147 | .829         | 8  | .058  |
|                                           | metformin           | .228                            | 4  |      | .926         | 4  | .572  |
|                                           | metformin & avandia | .280                            | 3  |      | .938         | 3  | .520  |
| waist at 6 months in cm                   | placebo             | .172                            | 8  | .200 | .965         | 8  | .852  |
|                                           | metformin           | .220                            | 4  |      | .940         | 4  | .654  |
|                                           | metformin & avandia | .247                            | 3  |      | .969         | 3  | .664  |
| baseline SBP                              | placebo             | .161                            | 8  | .200 | .934         | 8  | .551  |
|                                           | metformin           | .332                            | 4  |      | .853         | 4  | .235  |
|                                           | metformin & avandia | .374                            | 3  |      | .778         | 3  | .062  |
| 6 month SBP                               | placebo             | .214                            | 8  | .200 | .904         | 8  | .311  |
|                                           | metformin           | .290                            | 4  |      | .863         | 4  | .271  |
|                                           | metformin & avandia | .219                            | 3  |      | .987         | 3  | .780  |
| baseline DBP                              | placebo             | .289                            | 8  | .047 | .736         | 8  | .006  |
|                                           | metformin           | .331                            | 4  |      | .877         | 4  | .325  |
|                                           | metformin & avandia | .341                            | 3  |      | .846         | 3  | .230  |
| 6month DBP                                | placebo             | .184                            | 8  | .200 | .889         | 8  | .230  |
|                                           | metformin           | .232                            | 4  |      | .968         | 4  | .827  |
|                                           | metformin & avandia | .175                            | 3  |      | 1.000        | 3  | 1.000 |
| FBS converted to mmol/L (corrected)       | placebo             | .126                            | 8  | .200 | .965         | 8  | .860  |
|                                           | metformin           | .303                            | 4  |      | .791         | 4  | .086  |
|                                           | metformin & avandia | .253                            | 3  |      | .964         | 3  | .637  |

|                                               |                     |      |   |      |      |   |      |
|-----------------------------------------------|---------------------|------|---|------|------|---|------|
| 6-month fasting blood sugar mmol/L(corrected) | placebo             | .192 | 8 | .200 | .932 | 8 | .538 |
|                                               | metformin           | .295 | 4 |      | .857 | 4 | .250 |
|                                               | metformin & avandia | .196 | 3 |      | .996 | 3 | .878 |
| Fasting insulin at baseline (avg)             | placebo             | .147 | 8 | .200 | .982 | 8 | .974 |
|                                               | metformin           | .292 | 4 |      | .928 | 4 | .580 |
|                                               | metformin & avandia | .359 | 3 |      | .811 | 3 | .142 |
| 6mon fasting insulin                          | placebo             | .178 | 8 | .200 | .939 | 8 | .605 |
|                                               | metformin           | .198 | 4 |      | .969 | 4 | .836 |
|                                               | metformin & avandia | .346 | 3 |      | .837 | 3 | .206 |
| Hb A-1-C                                      | placebo             | .269 | 8 | .092 | .815 | 8 | .041 |
|                                               | metformin           | .329 | 4 |      | .895 | 4 | .406 |
|                                               | metformin & avandia | .292 | 3 |      | .923 | 3 | .463 |
| Hb A-1-C at 6 month                           | placebo             | .148 | 8 | .200 | .955 | 8 | .761 |
|                                               | metformin           | .262 | 4 |      | .895 | 4 | .408 |
|                                               | metformin & avandia | .292 | 3 |      | .923 | 3 | .463 |
| HOMA-IR baseline(corrected and checked)       | placebo             | .185 | 8 | .200 | .973 | 8 | .921 |
|                                               | metformin           | .207 | 4 |      | .978 | 4 | .891 |
|                                               | metformin & avandia | .356 | 3 |      | .816 | 3 | .154 |
| HOMA-IR 6months (corrected)                   | placebo             | .176 | 8 | .200 | .969 | 8 | .891 |
|                                               | metformin           | .164 | 4 |      | .987 | 4 | .943 |
|                                               | metformin & avandia | .337 | 3 |      | .855 | 3 | .253 |
| baseline CHOLB                                | placebo             | .229 | 8 | .200 | .887 | 8 | .222 |
|                                               | metformin           | .254 | 4 |      | .921 | 4 | .544 |
|                                               | metformin & avandia | .362 | 3 |      | .804 | 3 | .125 |
| Cholesterol at 6 month                        | placebo             | .142 | 8 | .200 | .952 | 8 | .732 |
|                                               | metformin           | .170 | 4 |      | .981 | 4 | .909 |
|                                               | metformin & avandia | .214 | 3 |      | .989 | 3 | .801 |
| baseline HDLB                                 | placebo             | .207 | 8 | .200 | .874 | 8 | .166 |
|                                               | metformin           | .250 | 4 |      | .950 | 4 | .715 |
|                                               | metformin & avandia | .307 | 3 |      | .904 | 3 | .398 |

|                             |                     |      |   |       |       |   |      |
|-----------------------------|---------------------|------|---|-------|-------|---|------|
| HDL at 6 month visit        | placebo             | .158 | 8 | .200* | .932  | 8 | .537 |
|                             | metformin           | .135 | 4 |       | 1.000 | 4 | .999 |
|                             | metformin & avandia | .228 | 3 |       | .982  | 3 | .743 |
| baseline LDL                | placebo             | .196 | 8 | .200* | .893  | 8 | .250 |
|                             | metformin           | .276 | 4 |       | .945  | 4 | .684 |
|                             | metformin & avandia | .370 | 3 |       | .786  | 3 | .082 |
| LDL 6 month visit           | placebo             | .200 | 8 | .200* | .906  | 8 | .325 |
|                             | metformin           | .223 | 4 |       | .945  | 4 | .686 |
|                             | metformin & avandia | .349 | 3 |       | .832  | 3 | .194 |
| Triglycerides (mmol/L) bsln | placebo             | .159 | 8 | .200* | .969  | 8 | .892 |
|                             | metformin           | .224 | 4 |       | .949  | 4 | .709 |
|                             | metformin & avandia | .257 | 3 |       | .961  | 3 | .621 |
| 6month TG                   | placebo             | .210 | 8 | .200* | .910  | 8 | .356 |
|                             | metformin           | .261 | 4 |       | .892  | 4 | .394 |
|                             | metformin & avandia | .214 | 3 |       | .989  | 3 | .803 |
| Adiponectin at baseline     | placebo             | .148 | 8 | .200* | .986  | 8 | .988 |
|                             | metformin           | .260 | 4 |       | .952  | 4 | .729 |
|                             | metformin & avandia | .292 | 3 |       | .923  | 3 | .463 |
| Adiponectin at 6 months     | placebo             | .202 | 8 | .200* | .941  | 8 | .623 |
|                             | metformin           | .321 | 4 |       | .875  | 4 | .317 |
|                             | metformin & avandia | .235 | 3 |       | .978  | 3 | .714 |

\*. This is a lower bound of the true significance.

a. Lilliefors Significance Correction
